# Supplementary material
Source: MDPI journal article supplement (https://www.mdpi.com/2079-8954/11/8/388)
Supplement: s1 [file s1]

### Supplementary Materials:

**Table S1.** Effects of different sample demographic characteristics on visual preferences for different types of modern residential entry space facades

| Demogr<br>aphic<br>characte<br>ristics | Item                       | Favorite types of modern residential entry space facades |                   |                   |               |              |                   |                   |             |             | X <sup>2</sup>  | P               |
|----------------------------------------|----------------------------|----------------------------------------------------------|-------------------|-------------------|---------------|--------------|-------------------|-------------------|-------------|-------------|-----------------|-----------------|
|                                        |                            | A                                                        | B                 | C                 | D             | E            | F                 | G                 | H           | I           |                 |                 |
| Gender(<br>%)                          | Male                       | 18(1<br>0.00<br>)                                        | 25(1<br>3.89<br>) | 51(2<br>8.33<br>) | 41(2<br>2.78) | 8(4.<br>44)  | 22(1<br>2.22<br>) | 7(3.<br>89)       | 5(2.<br>78) | 3(1.<br>67) | 33.<br>780      | 0.0<br>00*<br>* |
| Age<br>range(%)                        | Female                     | 18(9<br>.73)                                             | 31(1<br>6.76<br>) | 20(1<br>0.81<br>) | 66(3<br>5.68) | 3(1.<br>62)  | 15(8<br>.11)      | 23(1<br>2.43<br>) | 8(4.<br>32) | 1(0.<br>54) | 105<br>.64<br>2 | 0.0<br>00*<br>* |
|                                        | 18-30<br>years<br>old      | 16(1<br>3.45<br>)                                        | 29(2<br>4.37<br>) | 35(2<br>9.41<br>) | 25(2<br>1.01) | 5(4.<br>20)  | 2(1.<br>68)       | 5(4.<br>20)       | 0(0.<br>00) | 2(1.<br>68) |                 |                 |
|                                        | 31-40<br>years<br>old      | 9(7.<br>38)                                              | 7(5.<br>74)       | 24(1<br>9.67<br>) | 47(3<br>8.52) | 2(1.<br>64)  | 9(7.<br>38)       | 17(1<br>3.93<br>) | 6(4.<br>92) | 1(0.<br>82) |                 |                 |
|                                        | 41-60<br>years<br>old      | 10(1<br>1.36<br>)                                        | 8(9.<br>09)       | 12(1<br>3.64<br>) | 30(3<br>4.09) | 3(3.<br>41)  | 13(1<br>4.77<br>) | 7(7.<br>95)       | 4(4.<br>55) | 1(1.<br>14) |                 |                 |
|                                        | Over<br>61<br>years<br>old | 1(2.<br>78)                                              | 12(3<br>3.33<br>) | 0(0.<br>00)       | 5(13.<br>89)  | 1(2.<br>78)  | 13(3<br>6.11<br>) | 1(2.<br>78)       | 3(8.<br>33) | 0(0.<br>00) |                 |                 |
|                                        | Below<br>high<br>school    | 18(2<br>5.71<br>)                                        | 7(10<br>.00)      | 10(1<br>4.29<br>) | 12(1<br>7.14) | 1(1.<br>43)  | 14(2<br>0.00<br>) | 8(11<br>.43)      | 0(0.<br>00) | 0(0.<br>00) |                 |                 |
|                                        | High<br>school             | 6(9.<br>23)                                              | 11(1<br>6.92<br>) | 12(1<br>8.46<br>) | 20(3<br>0.77) | 2(3.<br>08)  | 8(12<br>.31)      | 2(3.<br>08)       | 2(3.<br>08) | 2(3.<br>08) |                 |                 |
|                                        | Specialty                  | 4(3.<br>48)                                              | 14(1<br>2.17<br>) | 21(1<br>8.26<br>) | 41(3<br>5.65) | 2(1.<br>74)  | 11(9<br>.57)      | 17(1<br>4.78<br>) | 4(3.<br>48) | 1(0.<br>87) |                 |                 |
| Under<br>gradu<br>ate                  | 5(5.<br>21)                | 24(2<br>5.00<br>)                                        | 27(2<br>8.13<br>) | 28(2<br>9.17)     | 6(6.<br>25)   | 0(0.<br>00)  | 3(3.<br>13)       | 2(2.<br>08)       | 1(1.<br>04) |             |                 |                 |
| Postgr<br>aduat<br>e or<br>above       | 3(15<br>.79)               | 0(0.<br>00)                                              | 1(5.<br>26)       | 6(31.<br>58)      | 0(0.<br>00)   | 4(21<br>.05) | 0(0.<br>00)       | 5(2<br>6.3<br>2)  | 0(0.<br>00) |             |                 |                 |

|                         |                                    |                   |                   |                   |                    |                  |                   |                   |                  |                  |                 |                 |
|-------------------------|------------------------------------|-------------------|-------------------|-------------------|--------------------|------------------|-------------------|-------------------|------------------|------------------|-----------------|-----------------|
|                         | Admi<br>nistrat<br>ion             | 0(0.<br>00)       | 0(0.<br>00)       | 0(0.<br>00)       | 0(0.0<br>0)        | 0(0.<br>00)      | 3(60<br>.00)      | 2(40<br>.00)      | 0(0.<br>00)      | 0(0.<br>00)      |                 |                 |
|                         | Institu<br>tion<br>Unit            | 0(0.<br>00)       | 12(3<br>0.77<br>) | 2(5.<br>13)       | 13(3<br>3.33)      | 5(1<br>2.8<br>2) | 1(2.<br>56)       | 0(0.<br>00)       | 6(1<br>5.3<br>8) | 0(0.<br>00)      |                 |                 |
|                         | Comp<br>any                        | 23(1<br>0.27<br>) | 20(8<br>.93)      | 68(3<br>0.36<br>) | 70(3<br>1.25)      | 4(1.<br>79)      | 11(4<br>.91)      | 21(9<br>.38)      | 5(2.<br>23)      | 2(0.<br>89)      |                 |                 |
| Career(<br>%)           | Freela<br>nce                      | 0(0.<br>00)       | 0(0.<br>00)       | 0(0.<br>00)       | 4(80.<br>00)       | 0(0.<br>00)      | 0(0.<br>00)       | 0(0.<br>00)       | 0(0.<br>00)      | 1(2<br>0.0<br>0) | 232<br>.05<br>3 | 0.0<br>00*<br>* |
|                         | Stude<br>nts                       | 9(24<br>.32)      | 16(4<br>3.24<br>) | 1(2.<br>70)       | 5(13.<br>51)       | 0(0.<br>00)      | 1(2.<br>70)       | 4(10<br>.81)      | 0(0.<br>00)      | 1(2.<br>70)      |                 |                 |
|                         | Retire<br>ment                     | 4(7.<br>41)       | 8(14<br>.81)      | 0(0.<br>00)       | 15(2<br>7.78)      | 2(3.<br>70)      | 21(3<br>8.89<br>) | 2(3.<br>70)       | 2(3.<br>70)      | 0(0.<br>00)      |                 |                 |
|                         | Other<br>s                         | 0(0.<br>00)       | 0(0.<br>00)       | 0(0.<br>00)       | 0(0.0<br>0)        | 0(0.<br>00)      | 0(0.<br>00)       | 1(10<br>0.00<br>) | 0(0.<br>00)      | 0(0.<br>00)      |                 |                 |
|                         | None                               | 33(1<br>0.06<br>) | 56(1<br>7.07<br>) | 71(2<br>1.65<br>) | 102(<br>31.10<br>) | 10(<br>3.0<br>5) | 9(2.<br>74)       | 30(9<br>.15)      | 13(<br>3.9<br>6) | 4(1.<br>22)      |                 |                 |
| Religion<br>(%)         | Budd<br>hism                       | 2(7.<br>41)       | 0(0.<br>00)       | 0(0.<br>00)       | 1(3.7<br>0)        | 1(3.<br>70)      | 23(8<br>5.19<br>) | 0(0.<br>00)       | 0(0.<br>00)      | 0(0.<br>00)      | 215<br>.61<br>3 | 0.0<br>00*<br>* |
|                         | Taois<br>m                         | 0(0.<br>00)       | 0(0.<br>00)       | 0(0.<br>00)       | 1(25.<br>00)       | 0(0.<br>00)      | 3(75<br>.00)      | 0(0.<br>00)       | 0(0.<br>00)      | 0(0.<br>00)      |                 |                 |
|                         | Christ<br>ianity                   | 1(16<br>.67)      | 0(0.<br>00)       | 0(0.<br>00)       | 3(50.<br>00)       | 0(0.<br>00)      | 2(33<br>.33)      | 0(0.<br>00)       | 0(0.<br>00)      | 0(0.<br>00)      |                 |                 |
|                         | Under<br>30,<br>000<br>RMB         | 4(11<br>.43)      | 23(6<br>5.71<br>) | 1(2.<br>86)       | 2(5.7<br>1)        | 0(0.<br>00)      | 0(0.<br>00)       | 4(11<br>.43)      | 0(0.<br>00)      | 1(2.<br>86)      |                 |                 |
| Annual<br>income(<br>%) | 30,<br>000 -<br>50,<br>000<br>RMB  | 15(4<br>0.54<br>) | 0(0.<br>00)       | 0(0.<br>00)       | 6(16.<br>22)       | 3(8.<br>11)      | 8(21<br>.62)      | 4(10<br>.81)      | 0(0.<br>00)      | 1(2.<br>70)      | 210<br>.34<br>5 | 0.0<br>00*<br>* |
|                         | 50,<br>000 -<br>100,<br>000<br>RMB | 15(8<br>.11)      | 16(8<br>.65)      | 45(2<br>4.32<br>) | 71(3<br>8.38)      | 0(0.<br>00)      | 24(1<br>2.97<br>) | 10(5<br>.41)      | 3(1.<br>62)      | 1(0.<br>54)      |                 |                 |

|                                  |                                                   |                   |                   |                   |               |             |                   |                   |                  |             |          |          |
|----------------------------------|---------------------------------------------------|-------------------|-------------------|-------------------|---------------|-------------|-------------------|-------------------|------------------|-------------|----------|----------|
|                                  | 000<br>RMB<br>100,<br>000 -<br>200,<br>000<br>RMB | 1(1.<br>03)       | 11(1<br>1.34<br>) | 24(2<br>4.74<br>) | 26(2<br>6.80) | 8(8.<br>25) | 5(5.<br>15)       | 12(1<br>2.37<br>) | 9(9.<br>28)      | 1(1.<br>03) |          |          |
|                                  | More<br>than<br>200,<br>000<br>RMB                | 1(9.<br>09)       | 6(54<br>.55)      | 1(9.<br>09)       | 2(18.<br>18)  | 0(0.<br>00) | 0(0.<br>00)       | 0(0.<br>00)       | 1(9.<br>09)      | 0(0.<br>00) |          |          |
|                                  | Half to<br>1 year                                 | 0(0.<br>00)       | 5(62<br>.50)      | 1(12<br>.50)      | 2(25.<br>00)  | 0(0.<br>00) | 0(0.<br>00)       | 0(0.<br>00)       | 0(0.<br>00)      | 0(0.<br>00) |          |          |
| Length<br>of<br>residenc<br>e(%) | 1-3<br>years                                      | 11(2<br>1.15<br>) | 0(0.<br>00)       | 13(2<br>5.00<br>) | 15(2<br>8.85) | 5(9.<br>62) | 5(9.<br>62)       | 2(3.<br>85)       | 1(1.<br>92)      | 0(0.<br>00) | 148      | 0.0      |
|                                  | 3-10<br>years                                     | 1(0.<br>81)       | 14(1<br>1.29<br>) | 53(4<br>2.74<br>) | 41(3<br>3.06) | 3(2.<br>42) | 8(6.<br>45)       | 1(0.<br>81)       | 1(0.<br>81)      | 2(1.<br>61) | .90<br>1 | 00*<br>* |
|                                  | Over<br>10<br>years                               | 24(1<br>3.26<br>) | 37(2<br>0.44<br>) | 4(2.<br>21)       | 49(2<br>7.07) | 3(1.<br>66) | 24(1<br>3.26<br>) | 27(1<br>4.92<br>) | 11(<br>6.0<br>8) | 2(1.<br>10) |          |          |

\* represents  $p < 0.05$ , \*\* represents  $p < 0.01$ , A represents Animal type, B represents Plant type, C represents Geometric type, D represents Artifact type, E represents Figure type, F represents Exorcism type, G represents Chinese character type, H represents Combination type, I represents Facade without traditional patterns.

**Table S2:** Effects of different sample demographic characteristics on emotional responses to different types of modern residential entry space facades

**Table S2-1.** Effects of gender on emotional responses to different types of modern residential entry space facades

|                             | Gender( $\bar{X} \pm SD$ ) |               | F      | p       |
|-----------------------------|----------------------------|---------------|--------|---------|
|                             | Male(n=180)                | Female(n=185) |        |         |
| Animal type- calm           | 1.27±0.78                  | 1.49±0.79     | 6.791  | 0.010** |
| Animal type- pleasant       | 2.57±0.76                  | 2.75±0.78     | 4.690  | 0.031*  |
| Animal type- safe           | 2.52±0.81                  | 2.78±0.78     | 9.911  | 0.002** |
| Plant type- pleasant        | 1.26±0.77                  | 1.49±0.85     | 7.040  | 0.008** |
| Plant type- interesting     | 2.14±0.78                  | 2.34±0.81     | 5.591  | 0.019*  |
| Geometric type- calm        | 3.11±0.77                  | 2.86±0.99     | 7.330  | 0.007** |
| Geometric type- interesting | 1.90±0.76                  | 1.63±0.83     | 10.754 | 0.001** |

|                                     | Gender( $\bar{X}\pm SD$ ) |               | F      | p       |
|-------------------------------------|---------------------------|---------------|--------|---------|
|                                     | Male(n=180)               | Female(n=185) |        |         |
| Artifact type- calm                 | 2.14±0.73                 | 2.32±0.78     | 5.182  | 0.023*  |
| Artifact type- calm                 | 3.26±1.09                 | 3.49±0.85     | 5.308  | 0.022*  |
| Exorcism type- safe                 | 2.37±1.41                 | 2.84±1.33     | 10.540 | 0.001** |
| Chinese character type- calm        | 1.34±0.72                 | 1.57±0.79     | 8.002  | 0.005** |
| Chinese character type- interesting | 2.18±0.68                 | 2.34±0.71     | 4.637  | 0.032*  |

\* represents  $p < 0.05$ , \*\* represents  $p < 0.01$ .

**Table S2-2.** Influence of age range on emotional responses to different types of modern residential entry space facades

|                                     | Age range( $\bar{X}\pm SD$ ) |                           |                          |                            | F      | p       |
|-------------------------------------|------------------------------|---------------------------|--------------------------|----------------------------|--------|---------|
|                                     | 18-30 years<br>old(n=119)    | 31-40 years<br>old(n=122) | 41-60 years<br>old(n=88) | Over 61 years<br>old(n=36) |        |         |
| Animal type-pleasant                | 2.55±0.90                    | 2.60±0.75                 | 2.93±0.50                | 2.58±0.81                  | 5.064  | 0.002** |
| Animal type- safe                   | 2.51±0.89                    | 2.58±0.79                 | 2.92±0.57                | 2.67±0.89                  | 4.932  | 0.002** |
| Animal type-interesting             | 3.08±1.07                    | 3.20±0.88                 | 3.76±0.61                | 3.22±1.02                  | 10.466 | 0.000** |
| Geometric type- safe                | 0.52±0.83                    | 0.48±0.99                 | 0.94±1.05                | 0.78±0.93                  | 5.057  | 0.002** |
| Artifact type- calm                 | 2.10±0.83                    | 2.19±0.74                 | 2.42±0.72                | 2.39±0.55                  | 3.717  | 0.012*  |
| Artifact type-interesting           | 2.59±0.85                    | 2.41±0.85                 | 2.66±0.66                | 2.75±0.55                  | 2.729  | 0.044*  |
| Figure type- safe                   | 1.80±0.73                    | 1.76±0.80                 | 1.93±0.69                | 2.17±0.88                  | 3.123  | 0.026*  |
| Figure type-interesting             | 1.36±0.76                    | 1.34±0.86                 | 1.64±0.75                | 1.56±0.84                  | 3.102  | 0.027*  |
| Exorcism type- calm                 | 1.36±0.79                    | 1.33±0.72                 | 1.63±0.72                | 1.56±0.88                  | 3.325  | 0.020*  |
| Exorcism type-pleasant              | 1.41±0.88                    | 1.28±0.73                 | 1.64±0.87                | 1.42±0.81                  | 3.231  | 0.023*  |
| Exorcism type- safe                 | 2.43±1.42                    | 2.25±1.40                 | 3.25±1.15                | 2.86±1.22                  | 10.937 | 0.000** |
| Chinese character type- calm        | 1.42±0.75                    | 1.34±0.74                 | 1.72±0.71                | 1.33±0.86                  | 4.852  | 0.003** |
| Chinese character type- pleasant    | 3.02±0.78                    | 2.99±0.82                 | 3.33±0.74                | 2.89±0.71                  | 4.522  | 0.004** |
| Chinese character type- interesting | 2.24±0.71                    | 2.23±0.69                 | 2.44±0.69                | 2.00±0.63                  | 3.840  | 0.010** |
| Combination type-calm               | 1.95±0.79                    | 2.11±0.76                 | 2.41±0.74                | 1.89±0.85                  | 7.044  | 0.000** |
| Combination type-pleasant           | 1.68±0.75                    | 1.83±0.79                 | 2.08±0.76                | 1.56±0.69                  | 6.201  | 0.000** |
| Combination type-safe               | 1.17±0.86                    | 1.36±0.79                 | 1.58±0.83                | 1.22±0.83                  | 4.451  | 0.004** |

|                                  | Age range( $\bar{X}\pm SD$ ) |                           |                          |                            | F     | p       |
|----------------------------------|------------------------------|---------------------------|--------------------------|----------------------------|-------|---------|
|                                  | 18-30 years<br>old(n=119)    | 31-40 years<br>old(n=122) | 41-60 years<br>old(n=88) | Over 61 years<br>old(n=36) |       |         |
| Combination type-<br>interesting | 1.28±0.81                    | 1.23±0.68                 | 1.69±0.78                | 1.11±0.52                  | 9.107 | 0.000** |

\* represents  $p < 0.05$ , \*\* represents  $p < 0.01$ .

**Table S2-3.** Influence of education level on emotional responses to different types of modern residential entry space facades

|                                     | Education level( $\bar{X}\pm SD$ ) |                      |                  |                     |                     | F     | p      |
|-------------------------------------|------------------------------------|----------------------|------------------|---------------------|---------------------|-------|--------|
|                                     | Below<br>high<br>school(n=70)      | High<br>school(n=65) | Specialty(n=115) | Undergraduate(n=96) | Postgraduate (n=19) |       |        |
| Geometric<br>type- calm             | 2.71±0.84                          | 3.23±0.75            | 2.93±0.97        | 3.11±0.82           | 2.79±1.18           | 3.770 | 0.005* |
| Geometric<br>type- safe             | 0.29±0.59                          | 0.71±0.84            | 0.74±1.12        | 0.65±0.96           | 0.95±1.27           | 3.283 | 0.012* |
| Combination<br>type-<br>pleasant    | 1.67±0.61                          | 1.89±0.75            | 1.86±0.90        | 1.72±0.71           | 2.26±0.81           | 2.870 | 0.023* |
| Combination<br>type- safe           | 1.21±0.72                          | 1.37±0.74            | 1.32±0.90        | 1.30±0.84           | 1.95±0.97           | 3.038 | 0.017* |
| Combination<br>type-<br>interesting | 1.09±0.56                          | 1.42±0.73            | 1.45±0.88        | 1.31±0.70           | 1.58±0.84           | 3.321 | 0.011* |

\* represents  $p < 0.05$ , \*\* represents  $p < 0.01$ .

**Table S2-4.** Influence of career on emotional responses to different types of modern residential entry space facades

|                         | Career( $\bar{X}\pm SD$ ) |                           |                |                |                |                  |             | F     | p       |
|-------------------------|---------------------------|---------------------------|----------------|----------------|----------------|------------------|-------------|-------|---------|
|                         | Administration<br>(n=5)   | Institution<br>Unit(n=39) | Company(n=224) | Freelance(n=5) | Students(n=37) | Retirement(n=54) | Others(n=1) |       |         |
| Animal type-interesting | 3.60±0.55                 | 3.56±0.82                 | 3.27±0.94      | 3.40±0.55      | 2.86±1.18      | 3.48±0.82        | 4.00±0.1    | 2.451 | 0.025*  |
| Geometric type-calm     | 2.80±0.84                 | 3.05±0.83                 | 2.86±0.90      | 3.00±1.22      | 3.27±0.77      | 3.26±0.89        | 4.00±0.1    | 2.582 | 0.018*  |
| Geometric type-safe     | 0.20±0.45                 | 0.77±0.90                 | 0.49±0.91      | 0.60±0.89      | 0.68±0.91      | 1.11±1.16        | 2.00±0.1    | 3.811 | 0.001** |

|                                 | Career( $\bar{X} \pm SD$ ) |                           |                |                |                |                  |             | F    | P       |
|---------------------------------|----------------------------|---------------------------|----------------|----------------|----------------|------------------|-------------|------|---------|
|                                 | Administration<br>(n=5)    | Institution<br>Unit(n=39) | Company(n=224) | Freelance(n=5) | Students(n=37) | Retirement(n=54) | Others(n=1) |      |         |
| Artifact type-calm              | 2.00±0.71                  | 2.18±0.82                 | 2.15±0.76      | 2.20±0.84      | 2.30±0.81      | 2.59±0.57        | 3.00±0.1    | 2.85 | 0.010** |
| Figure type-calm                | 2.00±1.87                  | 1.51±0.85                 | 1.22±0.73      | 1.20±0.45      | 1.41±0.83      | 1.63±0.81        | 2.00±0.1    | 3.21 | 0.004** |
| Figure type-pleasant            | 1.20±1.64                  | 1.54±0.91                 | 1.30±0.77      | 1.60±0.55      | 1.57±0.83      | 1.74±0.81        | 2.00±0.1    | 2.76 | 0.012*  |
| Figure type-interesting         | 1.80±1.64                  | 1.44±0.85                 | 1.35±0.78      | 2.20±0.84      | 1.41±0.80      | 1.70±0.69        | 2.00±0.1    | 2.46 | 0.024*  |
| Exorcism type-calm              | 1.00±0.00                  | 1.36±0.74                 | 1.34±0.72      | 1.60±1.14      | 1.54±0.84      | 1.81±0.80        | 2.00±0.1    | 3.51 | 0.002** |
| Exorcism type-pleasant          | 1.00±0.00                  | 1.36±0.81                 | 1.34±0.79      | 1.20±0.84      | 1.51±0.96      | 1.80±0.88        | 2.00±0.1    | 2.74 | 0.013*  |
| Exorcism type-safe              | 2.00±1.41                  | 2.77±1.42                 | 2.35±1.37      | 3.20±1.79      | 2.86±1.40      | 3.35±1.05        | 4.00±0.1    | 4.92 | 0.000** |
| Chinese character type-pleasant | 2.40±1.14                  | 3.05±0.69                 | 3.00±0.82      | 3.40±0.89      | 3.27±0.65      | 3.26±0.71        | 4.00±0.1    | 2.24 | 0.039*  |

\* represents  $p < 0.05$ , \*\* represents  $p < 0.01$ .

**Table S2-5.** Influence of religion on emotional responses to different types of modern residential entry space facades

|                         | Religion( $\bar{X} \pm SD$ ) |                |             |                   | F     | p       |
|-------------------------|------------------------------|----------------|-------------|-------------------|-------|---------|
|                         | None(n=328)                  | Buddhism(n=27) | Taoism(n=4) | Christianity(n=6) |       |         |
| Animal type-calm        | 1.34±0.77                    | 1.59±0.80      | 1.75±0.96   | 2.33±1.37         | 4.209 | 0.006** |
| Geometric type-pleasant | 1.74±0.87                    | 1.33±0.78      | 2.00±0.82   | 1.17±0.41         | 2.863 | 0.037*  |

|                         | Religion( $\bar{X}\pm SD$ ) |                |             |                   | F     | p       |
|-------------------------|-----------------------------|----------------|-------------|-------------------|-------|---------|
|                         | None(n=328)                 | Buddhism(n=27) | Taoism(n=4) | Christianity(n=6) |       |         |
| Figure type-interesting | 1.40±0.79                   | 1.74±0.86      | 2.00±1.41   | 1.83±0.75         | 2.694 | 0.046*  |
| Exorcism type-calm      | 1.39±0.73                   | 1.63±0.88      | 2.50±1.29   | 2.17±1.17         | 5.556 | 0.001** |
| Exorcism type-pleasant  | 1.39±0.80                   | 1.52±0.98      | 2.75±1.50   | 1.67±0.82         | 3.928 | 0.009** |
| Exorcism type-safe      | 2.54±1.39                   | 2.96±1.29      | 4.00±0.00   | 3.83±0.41         | 3.843 | 0.010** |

\* represents  $p < 0.05$ , \*\* represents  $p < 0.01$ .

**Table S2-6.** Influence of annual income on emotional responses to different types of modern residential entry space facades

|                              | Annual income( $\bar{X}\pm SD$ ) |                           |                             |                             |                             | F     | p       |
|------------------------------|----------------------------------|---------------------------|-----------------------------|-----------------------------|-----------------------------|-------|---------|
|                              | Under 30,000 RMB(n=35)           | 30,000 - 50,000 RMB(n=37) | 50,000 - 100,000 RMB(n=185) | 100,000 - 200,000 RMB(n=97) | More than 200,000 RMB(n=11) |       |         |
| Animal type-calm             | 1.20±0.68                        | 1.68±0.94                 | 1.37±0.74                   | 1.30±0.79                   | 1.82±1.08                   | 2.903 | 0.022*  |
| Animal type-safe             | 2.54±0.85                        | 2.92±0.83                 | 2.55±0.81                   | 2.74±0.74                   | 3.00±0.77                   | 2.865 | 0.023*  |
| Exorcism type-calm           | 1.31±0.68                        | 1.84±0.93                 | 1.39±0.74                   | 1.38±0.71                   | 1.64±0.92                   | 3.332 | 0.011*  |
| Exorcism type-pleasant       | 1.31±0.80                        | 1.81±1.00                 | 1.40±0.81                   | 1.33±0.77                   | 1.64±0.92                   | 2.740 | 0.029*  |
| Exorcism type-safe           | 2.69±1.39                        | 3.16±1.26                 | 2.43±1.39                   | 2.68±1.38                   | 2.82±1.54                   | 2.409 | 0.049*  |
| Chinese character type-calm  | 1.37±0.69                        | 1.86±0.75                 | 1.40±0.75                   | 1.40±0.77                   | 1.82±0.75                   | 3.897 | 0.004** |
| Combination type-interesting | 1.17±0.51                        | 1.68±0.94                 | 1.35±0.78                   | 1.30±0.71                   | 1.18±0.60                   | 2.459 | 0.045*  |

\* represents  $p < 0.05$ , \*\* represents  $p < 0.01$ .

**Table S2-7.** Influence of length of residence on emotional responses to different types of modern residential entry space facades

|                         | Length of residence( $\bar{X}\pm SD$ ) |                 |                   |                      | F     | p       |
|-------------------------|----------------------------------------|-----------------|-------------------|----------------------|-------|---------|
|                         | Half to 1 year(n=8)                    | 1-3 years(n=52) | 3-10 years(n=124) | Over 10 years(n=181) |       |         |
| Animal type- pleasant   | 2.75±0.71                              | 2.46±0.90       | 2.56±0.77         | 2.78±0.72            | 3.326 | 0.020*  |
| Animal type- safe       | 2.75±0.71                              | 2.58±0.87       | 2.51±0.82         | 2.76±0.76            | 2.691 | 0.046*  |
| Animal type-interesting | 3.13±0.99                              | 2.85±1.16       | 3.21±0.86         | 3.50±0.87            | 7.538 | 0.000** |
| Plant type- safe        | 0.63±0.52                              | 0.75±0.71       | 1.13±0.93         | 1.06±0.98            | 2.648 | 0.049*  |

|                                        | Length of residence( $\bar{X}\pm SD$ ) |                    |                      |                         | F      | p       |
|----------------------------------------|----------------------------------------|--------------------|----------------------|-------------------------|--------|---------|
|                                        | Half to 1<br>year(n=8)                 | 1-3<br>years(n=52) | 3-10<br>years(n=124) | Over 10<br>years(n=181) |        |         |
| Artifact type- calm                    | 2.00±0.93                              | 2.19±0.79          | 2.07±0.76            | 2.37±0.72               | 4.225  | 0.006** |
| Artifact type- pleasant                | 3.88±0.35                              | 3.29±0.98          | 3.19±1.15            | 3.50±0.85               | 3.296  | 0.021*  |
| Artifact type- safe                    | 2.50±1.07                              | 2.52±0.80          | 2.48±0.75            | 2.71±0.65               | 2.707  | 0.045*  |
| Artifact type-<br>interesting          | 2.50±1.07                              | 2.50±0.75          | 2.41±0.86            | 2.69±0.72               | 3.165  | 0.025*  |
| Exorcism type- calm                    | 1.25±0.71                              | 1.62±0.89          | 1.28±0.74            | 1.49±0.73               | 3.144  | 0.025*  |
| Exorcism type- safe                    | 2.75±1.39                              | 2.65±1.40          | 2.09±1.41            | 2.94±1.27               | 10.091 | 0.000** |
| Exorcism type-<br>interesting          | 2.63±1.51                              | 3.08±0.97          | 2.80±1.16            | 3.18±1.07               | 3.301  | 0.021*  |
| Chinese character type-<br>calm        | 1.25±0.71                              | 1.63±0.82          | 1.29±0.74            | 1.53±0.74               | 3.773  | 0.011*  |
| Chinese character type-<br>pleasant    | 3.25±0.89                              | 3.13±0.79          | 2.88±0.86            | 3.18±0.71               | 3.879  | 0.009** |
| Chinese character type-<br>safe        | 2.38±1.06                              | 2.65±0.76          | 2.40±0.87            | 2.74±0.73               | 4.917  | 0.002** |
| Chinese character type-<br>interesting | 1.88±0.99                              | 2.33±0.71          | 2.15±0.68            | 2.34±0.69               | 2.686  | 0.046*  |

\* represents  $p < 0.05$ , \*\* represents  $p < 0.01$ .

**Table S3:** Effects of different sample demographic characteristics on health benefit assessments for different types of modern residential facades

**Table S3-1.** Effects of age range on health benefit assessments of different types of modern residential facades

|    | Age range( $\bar{X}\pm SD$ ) |                          |                          |                            | F     | p       |
|----|------------------------------|--------------------------|--------------------------|----------------------------|-------|---------|
|    | 18-30 years<br>old(n=35)     | 31-40 years<br>old(n=56) | 41-60 years<br>old(n=37) | Over 61 years<br>old(n=26) |       |         |
| B1 | 3.49±0.61                    | 3.38±0.82                | 3.68±0.82                | 4.12±0.65                  | 6.150 | 0.001** |
| B2 | 3.74±0.56                    | 3.54±0.81                | 3.59±1.04                | 4.12±0.65                  | 3.363 | 0.020*  |

\* represents  $p < 0.05$ , \*\* represents  $p < 0.01$ , 1 represents fatigue elimination,2 represents revitalization.

**Table S3-2.** Effects of career on health benefit assessments of different types of modern residential facades

|    | Career( $\bar{X}\pm SD$ ) |                                   |               |                 |                |                 | F     | P       |
|----|---------------------------|-----------------------------------|---------------|-----------------|----------------|-----------------|-------|---------|
|    | Administration<br>(n=15)  | Institutio<br>n<br>Unit(n=16<br>) | Company(n=72) | Freelance(n=15) | Students(n=35) | Retirement(n=1) |       |         |
| A3 | 3.00±0.85                 | 2.94±0.77                         | 2.32±0.89     | 2.27±0.80       | 2.29±0.57      | 3.00±null       | 3.536 | 0.005** |



| Career( $\bar{X} \pm SD$ ) |                          |                       |               |                 |                |                 | F     | P       |
|----------------------------|--------------------------|-----------------------|---------------|-----------------|----------------|-----------------|-------|---------|
|                            | Administration<br>(n=15) | Institution<br>(n=16) | Company(n=72) | Freelance(n=15) | Students(n=35) | Retirement(n=1) |       |         |
| B1                         | 3.27±0.59                | 3.50±0.82             | 3.50±0.84     | 3.53±0.74       | 3.97±0.62      | 5.00±null       | 3.249 | 0.008** |

\* represents  $p < 0.05$ , \*\* represents  $p < 0.01$ , 1 represents fatigue elimination, 3 represents mind calming.

**Table S3-3.** Effects of religion on health benefit assessments of different types of modern residential facades

| Religion( $\bar{X} \pm SD$ ) |             |               |             |                   | F      | p       |
|------------------------------|-------------|---------------|-------------|-------------------|--------|---------|
|                              | None(n=140) | Buddhism(n=5) | Taoism(n=4) | Christianity(n=5) |        |         |
| B1                           | 3.50±0.73   | 5.00±0.00     | 4.75±0.50   | 4.00±0.71         | 11.118 | 0.000** |
| B2                           | 3.66±0.74   | 3.40±2.19     | 4.75±0.50   | 4.00±0.71         | 2.822  | 0.041*  |
| B4                           | 3.61±0.83   | 5.00±0.00     | 2.75±2.06   | 4.00±0.71         | 5.999  | 0.001** |

\* represents  $p < 0.05$ , \*\* represents  $p < 0.01$ , 1 represents fatigue elimination, 2 represents revitalization, 4 represents concentration.

**Table S3-4.** Effects of annual income on health benefit assessments of different types of modern residential facades

| Annual income( $\bar{X} \pm SD$ ) |                           |                              |                               |                                |                               | F     | p      |
|-----------------------------------|---------------------------|------------------------------|-------------------------------|--------------------------------|-------------------------------|-------|--------|
|                                   | Under 30,000<br>RMB(n=24) | 30,000 - 50,000<br>RMB(n=23) | 50,000 - 100,000<br>RMB(n=58) | 100,000 - 200,000<br>RMB(n=40) | More than 200,000<br>RMB(n=9) |       |        |
| A1                                | 1.50±0.59                 | 1.57±0.99                    | 1.57±0.82                     | 2.10±0.78                      | 1.78±0.97                     | 3.317 | 0.012* |

\* represents  $p < 0.05$ , \*\* represents  $p < 0.01$ , 1 represents fatigue elimination.

**Table S3-5.** Effects of length of residence on health benefit assessments of different types of modern residential facades

| Length of residence( $\bar{X} \pm SD$ ) |                      |                 |                  |                     | F     | p       |
|-----------------------------------------|----------------------|-----------------|------------------|---------------------|-------|---------|
|                                         | Half to 1 year(n=20) | 1-3 years(n=11) | 3-10 years(n=44) | Over 10 years(n=79) |       |         |
| A1                                      | 1.80±0.62            | 2.18±0.75       | 1.86±0.80        | 1.53±0.89           | 3.030 | 0.031*  |
| B1                                      | 3.75±0.85            | 3.18±0.40       | 3.20±0.70        | 3.84±0.76           | 8.373 | 0.000** |
| B3                                      | 4.75±0.91            | 4.27±0.65       | 4.00±1.29        | 4.58±0.87           | 4.054 | 0.008** |

\* represents  $p < 0.05$ , \*\* represents  $p < 0.01$ , 1 represents fatigue elimination, 3 represents mind calming.
